# Supplementary material
Source: PubMed Central journal article supplement (PMC2040917)

**A**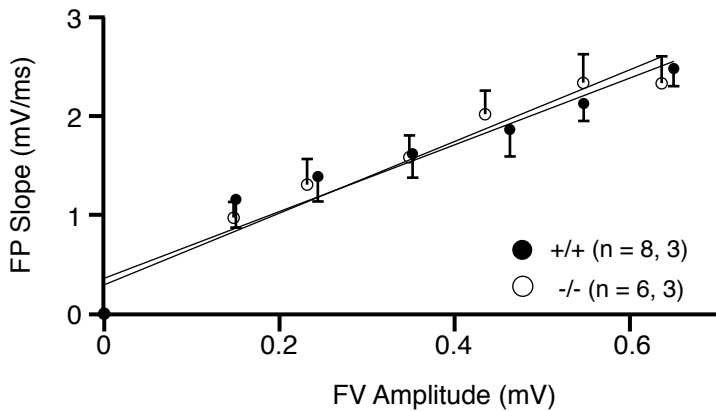**B**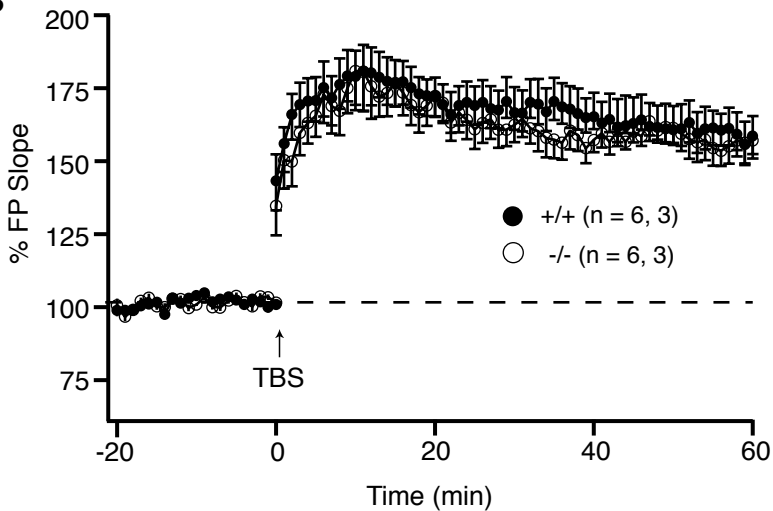

Supplement: pnas_0702717104_1.pdf [file pnas_0702717104_1.pdf]

**A**

+/+

-/-

SCH23390

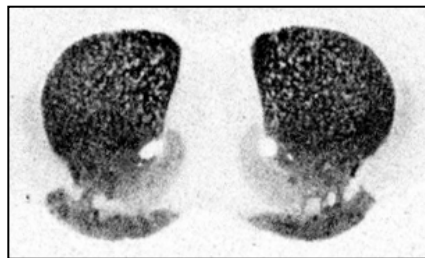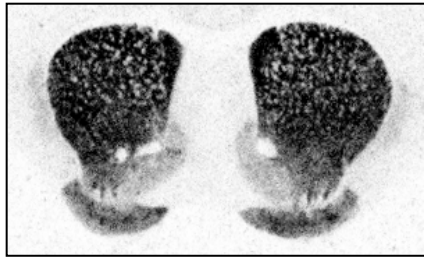

Spiperone

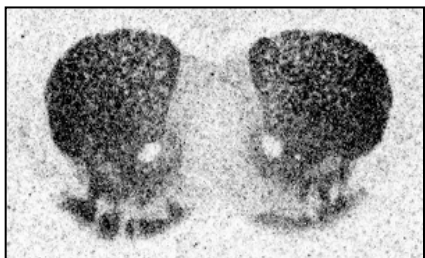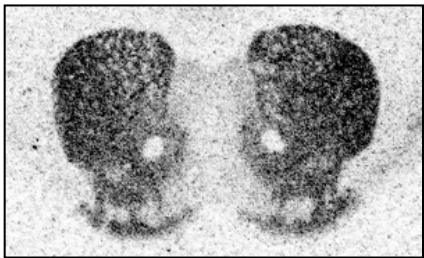**B**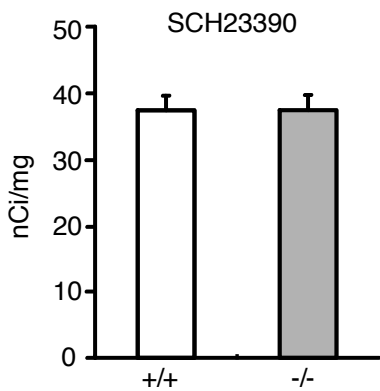**C**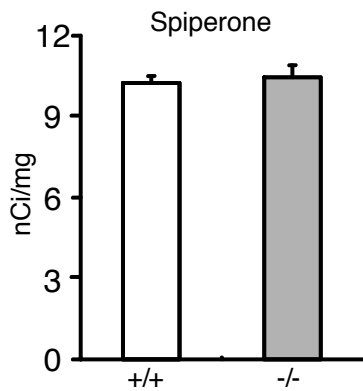

Supplement: pnas_0702717104_2.pdf [file pnas_0702717104_2.pdf]
